1 **Predicting biomass of resident kōkopu (*Galaxias*) populations using local habitat**

2 **composition**

3

4 Ben R. J. Crichton<sup>1,\*</sup>, Michael J.H. Hickford<sup>1</sup>, Angus R. McIntosh<sup>2</sup>, David R. Schiel<sup>1</sup>

5

6 <sup>1</sup>Marine Ecology Research Group, School of Biological Sciences, University of Canterbury,  
7 Christchurch, New Zealand

8

9 <sup>2</sup>Marine Ecology Research Group, School of Biological Sciences, University of Canterbury,  
10 Christchurch, New Zealand

11

12 \*Corresponding author email: [ben.crichton@pg.canterbury.ac.nz](mailto:ben.crichton@pg.canterbury.ac.nz)

13 **Abstract**

14           With the global decline of freshwater fishes, quantifying the body size-specific  
15 habitat use of vulnerable species is crucial for accurately evaluating population health,  
16 identifying the effects of anthropogenic stressors, and directing effective habitat  
17 restoration. Populations of New Zealand's endemic kōkopu species (*Galaxias fasciatus*, *G.*  
18 *argenteus*, and *G. postvectis*) have declined substantially over the last century in response  
19 to anthropogenic stressors, including habitat loss and fragmentation, invasive species, and  
20 over-exploitation. Despite well-understood habitat associations, key within-habitat features  
21 driving the reach-scale biomass of small and large kōkopu remain unclear. Here, we  
22 investigated whether the total biomass of small ( $\leq 90$  mm) and large ( $> 90$  mm) kōkopu was  
23 associated with total pool area, average pool depth, total bank cover, average substrate  
24 size, and average forest canopy cover across fifty-seven 50 m reaches. These features were  
25 selected because generally pool habitats are productive feeding areas, bank cover and  
26 substrate interstices are important refuges, and forest cover provides greater food  
27 availability. Because kōkopu are nocturnal, populations were sampled with removal at night  
28 using headlamps and hand-nets until reaches were visually depleted. Using Akaike's  
29 information criterion, it was found that increases in large kōkopu biomass were most  
30 parsimoniously explained by greater pool area and bank cover, whereas increases in small  
31 kōkopu biomass were best explained by low bank cover and greater average forest cover.  
32 This study demonstrated the importance of considering the ontogenetic shift in species'  
33 habitat use and provided an effective modelling approach for quantifying the size-specific  
34 habitat use of these stream-dwelling fish.

## 35 **Introduction**

36           Given the widespread decline of freshwater fishes [1], it is crucial to quantify which  
37 habitats are used during all stages of a species' life cycle so that population health can be  
38 accurately evaluated, effects of anthropogenic stressors can be tested, and successful  
39 rehabilitation measures implemented [2, 3]. Anthropogenic stressors such as pollution,  
40 habitat fragmentation and degradation, introduced species, river regulation, and over-  
41 exploitation have contributed to a substantial decline in riverine fish populations over the last  
42 century [4, 5]. Unfortunately, many statistical models used for studying the effects of  
43 anthropogenic stressors on populations are inaccurate due to being calibrated using only a  
44 fraction of the habitats used by a species [6]. Without accurate models relating body size and  
45 specific habitats, population assessments may be biased, which could lead to ineffective  
46 management decisions and unsuccessful, wasteful, or even harmful restoration efforts by  
47 excluding important microhabitats such as spawning sites or nursery grounds [7, 8].

48           Influential habitat variables that often determine the habitat selection of stream-  
49 dwelling fish include water velocity, in-stream refuges, and overhanging vegetation [9-11].  
50 Pools are often preferentially used microhabitats for freshwater fish because they have slower  
51 water velocities, which typically reduce an individual's energetic expenditure [12, 13] while  
52 improving feeding efficiency [14, 15]. In-stream cover, such as undercut banks, root-wads,  
53 debris dams, and interstices between large substratum are important refuges that many fish  
54 rely on to minimise the risk of predation and the impacts of physical disturbances [16, 17].  
55 Additionally, overhanging vegetation, such as riparian vegetation or forest canopy cover, is  
56 linked to a stream's primary productivity and plays a crucial role in providing terrestrial  
57 subsidies, in-stream cover, and hydrological stability [18, 19]. Therefore, these habitat  
58 features are likely influential determinants of habitat selection during at least one stage of the  
59 lifecycle of stream-dwelling fishes.

60           The importance of specific habitat features on habitat selection is often strongly  
61 determined by body size [20]. In freshwater fishes, variation in size-related habitat selection  
62 is typically due to individual selection of microhabitats that maximise energy gain and  
63 minimise energy expenditure or increase survival [21-23]. Because microhabitat selection is  
64 strongly linked to individual fitness, species may rely on several distinct microhabitats to  
65 support different size-classes [23, 24]. For species where different size-classes inhabit the  
66 same local environment, it is vital that restoration efforts incorporate potential ontogenetic  
67 shifts in size-specific microhabitat requirements to account for all size-classes in an  
68 ecosystem. This is especially important for species that exhibit intraspecific or intra-family  
69 competitive hierarchies, because inferior individuals may avoid preferred habitats when  
70 dominant congeners are present [25]. Social competitive hierarchies in freshwater fish often  
71 follow a size-related structure; large dominant individuals monopolise key feeding habitats  
72 and smaller individuals are displaced to less advantageous habitats [26, 27]. Therefore,  
73 understanding how abiotic and biotic influences affect the habitat use of distinct size-classes  
74 is essential to obtain a robust evaluation of population habitat use.

75           New Zealand's endemic banded kōkopu (*Galaxias fasciatus*), giant kōkopu (*G.*  
76 *argenteus*), and shortjaw kōkopu (*G. postvectis*), hereafter collectively referred to as  
77 'kōkopu', are diadromous fishes that inhabit the same stream environments during all but  
78 their larval life stage. Over the last century, kōkopu have undergone considerable declines in  
79 response to a combination of habitat loss, migratory barriers, introduced species, and fishing  
80 pressure [28-30]. The loss and degradation of adult habitats through activities including  
81 drainage schemes, land-use change, and deforestation are thought to be the biggest drivers of  
82 decline in kōkopu [29, 31]. Migratory barriers inhibit upstream dispersal to compatible  
83 habitats [32, 33] and introduced species like trout alter kōkopu habitat selection through  
84 predation and competitive exclusion [34, 35]. Post-larval kōkopu are also harvested in the

85 culturally, recreationally, and commercially important whitebait fishery [36]. Despite  
86 population declines, it is unknown how these anthropogenic stressors specifically alter  
87 kōkopu populations due to the lack of accurate size-specific habitat models.

88         Although size-specific habitat models have not been developed for kōkopu, there is a  
89 thorough understanding of general habitat preferences [37]. Greater kōkopu densities are  
90 often associated with the availability of slow-flowing pools because kōkopu are  
91 opportunistic, mostly nocturnal predators, that rely on the transport of aquatic and terrestrial  
92 invertebrates into pools from fast-flowing upstream habitats [29, 38]. Banded and shortjaw  
93 kōkopu are forest specialists, rarely inhabiting streams without forest canopies, but giant  
94 kōkopu also inhabit estuaries, swamps, or ponds [37, 39]. Each species depends on refuge  
95 areas for secure diurnal resting, predator escapement, and shelter from flood events [40].  
96 Despite having slightly different habitat preferences, the kōkopu species commonly co-occur  
97 and share similar environmental requirements (i.e., diet and habitat use), which likely  
98 indicates that each species should be influenced similarly by changes to habitat composition  
99 from anthropogenic stressors within stream environments.

100         Even though juvenile and adult kōkopu occupy the same local environments,  
101 individual microhabitat selection is strongly determined by the presence of larger  
102 conspecifics or congeners [41]. For example, small giant kōkopu minimise agonistic  
103 interactions with larger dominant conspecifics that control large pools at night by feeding  
104 during the day or by occupying alternative microhabitats at night [42]. Similarly, large  
105 banded kōkopu prefer deep, slow-flowing pools, with coarse substratum, whereas smaller  
106 individuals are likely displaced into shallow pools with faster water velocities and finer  
107 substratum [43]. Although size-related kōkopu microhabitat segregation [27, 44, 45] and the  
108 influence of habitat composition on total kōkopu biomass [11, 25] are understood, how  
109 within-habitat characteristics influence the reach-scale biomass of small and large kōkopu

110 separately is unknown. Such information would provide a more comprehensive and accurate  
111 description of kōkopu habitat requirements that could be used to improve habitat restoration  
112 efforts. Additionally, by understanding how small and large kōkopu are influenced by local  
113 environments, while all other influential environmental variables are being controlled for, a  
114 standardised prediction of likely kōkopu biomass based solely on local habitat characteristics  
115 can be obtained. These standardised estimates will allow the isolation and accurate testing of  
116 how individual environmental manipulations including dispersal barriers, introduced  
117 predators, fishing pressure, or habitat restoration efforts affect kōkopu populations by  
118 removing habitat-related biases.

119 To examine how kōkopu size-classes respond to habitat composition, all three kōkopu  
120 species were studied as one overall ‘population’ because body size is likely the key driver of  
121 habitat use, they commonly co-occur, have similar habitat requirements, and abide by intra-  
122 family competitive group behaviours [27, 46]. These factors likely mean that one species’  
123 position in a stream could be used by either of the other species if it was vacant. A size-class  
124 break-point of 90 mm (total length) was used to examine how small and large kōkopu  
125 respond to habitat composition. This break-point was selected because banded kōkopu and  
126 giant kōkopu are approximately one year old at this size and begin to compete for territory  
127 when >90 mm [47-49]. Equivalent studies have not been completed with shortjaw kōkopu,  
128 but they were pooled into the same size-class groups for consistency. The similar ecological  
129 and physiological characteristics between kōkopu species strongly suggest that the compiled  
130 grouping of species will allow an accurate investigation of size-related habitat selection  
131 without species-specific biases.

132 We aimed to identify habitat features that influence the biomass of small and large  
133 kōkopu. Specifically, we used Akaike’s Information Criterion (AIC), an information theoretic  
134 approach [50], to evaluate a candidate set of *a priori* models to explain variation in small and

135 large kōkopu biomass using local habitat features. To achieve this objective, kōkopu  
136 populations were surveyed across physically diverse stream reaches. We predicted that: (1)  
137 large kōkopu biomass would increase with pool area and depth, whereas small kōkopu  
138 biomass would decrease in such habitats, putatively due to larger fish competitively  
139 excluding smaller individuals within these key feeding areas; (2) large and small kōkopu  
140 biomass would increase with increasing bank cover and substrate size due to both providing  
141 refuges to all size-classes; and (3) both large and small kōkopu biomass would increase with  
142 forest canopy cover due to it likely providing greater food availability.

## 143 **Methods**

### 144 *Study Sites*

145 To investigate which habitat features are most strongly associated with reach-scale  
146 kōkopu biomass, three 50 m reaches were sampled within each of 19 streams on the West  
147 Coast of New Zealand's South Island during May and June 2021. Local topographic maps,  
148 site visits, and databases, such as Freshwater Ecosystems of New Zealand (FENZ; [51]) and  
149 the New Zealand Freshwater Fish Database (NZFFD; [52]), were used to select streams that  
150 contained kōkopu and that had no fish passage barriers or trout presence. All streams were  
151 open to whitebait fishing because unfished streams were limited. Physically diverse streams  
152 that included a wide range of habitat compositions were selected to provide a robust  
153 understanding of how individual habitat variables influenced kōkopu biomass. Sampling took  
154 place within two months to minimise seasonal differences in kōkopu biomass.

155

### 156 *Habitat survey*

157 Study reaches began and ended at riffles, which acted as minor fish barriers between  
158 reaches, were located in areas with minimal surface turbulence or natural visual-obstruction  
159 deposits (i.e., foam or fine debris collections), and were no deeper than 1.5 m. Habitat

160 surveys, completed during daylight hours, involved measuring the area and average depth of  
161 pools, availability of in-stream bank cover, average substrate size, and percentage cover of  
162 forest canopy within each reach. Forest cover was measured at approximately eight locations  
163 within each reach using a spherical crown densiometer [53] while standing in the middle of  
164 the waterway and facing upstream. In-stream bank cover was recorded by measuring the  
165 perimeter of root wads, undercut banks, or debris dams accessible to fish. Pool area was  
166 calculated using:

$$167 \quad PA = (W/2) \times (L/2) \times \pi \quad (\text{Eq. 1.})$$

168 where  $PA$  is pool area ( $\text{m}^2$ ),  $W$  is the maximum width of the pool (m), and  $L$  is the maximum  
169 length of the pool (m). Average pool depth was calculated from ten depth measurements  
170 along the  $W$  axis. The average substrate size within each reach was calculated from  
171 approximately 60 stones randomly selected using a Wolman's walk [54].

172

### 173 ***Kōkopu biomass survey***

174 The three 50 m reaches within each stream were sampled starting >1 h after sunset  
175 (using spotlighting) when kōkopu are active. Sampling consisted of counting kōkopu using a  
176 high-powered spotlight to scan the reach for fish in slow-flowing habitats [55]. This method  
177 has been used effectively for sampling kōkopu within wadeable streams at night [34, 56].  
178 Alternative fish sampling methods such as electrofishing and trapping are generally less  
179 effective for surveying kōkopu because they sink when stunned, occupy deep bank cover  
180 during the day, and may not encounter traps due to having high pool fidelity at night [57-59].  
181 The 1 h delay after sunset ensured that resident kōkopu had left their daytime refuges and  
182 moved into nocturnal foraging areas where they could be seen and captured. When spotted,  
183 kōkopu generally remained stationary and were caught using hand nets. All captured fish  
184 were placed into buckets of aerated stream water. When kōkopu were seen but not caught, the



185 estimated length and species of the individual were recorded and noted as a ‘miss’. Reaches  
186 were sampled using successive depletion passes until fish were no longer observed. This  
187 required up to five passes and took around 1.5 h per reach. Captured kōkopu were  
188 anaesthetised in 20 mg/L of AQUI-S water-dispersible liquid anaesthetic to facilitate  
189 handling. The total length of each fish was measured on a wet measuring board ( $\pm 1$  mm)  
190 before being weighed ( $\pm 0.01$  g). After measurements were taken, fish were placed in buckets  
191 of fresh stream water to recover, and then returned to their area of capture. All procedures  
192 were approved by the University of Canterbury Animal Ethics Committee (permit number  
193 2020/06R).

194

### 195 ***Data analysis***

196 Prior to analyses, large and small kōkopu biomass responses were square root  
197 transformed to meet assumptions of normality, and outliers (two large kōkopu responses and  
198 one small kōkopu response) were identified and removed using interquartile range criterion.  
199 Biomass measurements were used as a response instead of counts because kōkopu body mass  
200 varies substantially between individuals and is associated with available resources, whereas  
201 the association between fish counts and resource availability is also determined by  
202 competitive interactions [25]. Variance inflation factors (VIF) were calculated to ensure that  
203 there was no collinearity between predictors (i.e.,  $VIF \leq 4$ ; [60]). Because all VIF values  
204 were low ( $VIF < 2.0$ ) we proceeded with model selection.

205 To assess how local habitat composition influenced kōkopu biomass, a set of  
206 ecologically realistic *a priori* linear mixed-effects models, which included all combinations  
207 of the five habitat variables, was used to explain the biomass of each kōkopu size-class.  
208 Ecologically realistic interactions between habitat features were initially included, but later  
209 removed due to poor data spread creating unreliable results. Linear mixed-effects models

210 were constructed using the ‘lme’ function (Package ‘nlme’; [61]) in R version 4.1.1 [62] and  
211 included a random factor for stream so that each of the three reaches nested within a stream  
212 could be independently used to examine how habitat composition influenced kōkopu  
213 biomass. By focusing on the reach-scale, more accurate and informative localised habitat-  
214 biomass relationships could be obtained.

215 An information theoretic approach, using Akaike’s information criterion corrected for  
216 small sample size ( $AIC_c$ ), was used to determine which candidate models explained variation  
217 in large and small kōkopu biomass most parsimoniously [50]. Each model’s  $AIC_c$  was  
218 subtracted from the lowest  $AIC_c$  to determine its  $\Delta AIC_c$  [50]. Parsimonious models had  
219  $\Delta AIC_c$  values  $< 2$  [63]. Conditional coefficient of determination ( $R^2_c$ ; proportion of variance  
220 explained by fixed and random effects) values were calculated for each parsimonious model  
221 to evaluate goodness-of-fit because  $AIC_c$  only ranks models relative to each other [64, 65].  
222 The Akaike weight and  $R^2_c$  of parsimonious models were compared to select the most  
223 suitable model for explaining large and small kōkopu biomass.

224 Partial dependence plots, which show the independent effect of a single variable on the  
225 response by accounting for the average effects of all other variables in a model [66], were  
226 used to visually examine the independent effect of each habitat feature on the total biomass of  
227 large and small kōkopu. Using the ‘effects’ package [67], partial dependence plots were  
228 developed by extracting the independent effects of each variable within a linear mixed-effects  
229 model that included all five habitat features and a random factor for stream on the biomass of  
230 each size-class.

231

## 232 **Results**

233 Large kōkopu biomass was explained parsimoniously (i.e., a  $\Delta AIC_c < 2$ ) by two  
234 models (Table 1). Predictors in the first model (1L) were total bank cover and pool area,

235 while the second model (2L) also included total bank cover and pool area, but added average  
236 substrate size. Large kōkopu biomass was positively correlated with total pool area ( $R^2_c$   
237 =0.19,  $F_{1,53}=12.45$ ,  $P<0.001$ ; Fig. 1a), total bank cover ( $R^2_c=0.26$ ,  $F_{1,53}=18.75$ ,  $P<0.001$ ; Fig.  
238 1c), and average substrate size ( $R^2_c=0.11$ ,  $F_{1,53}=6.79$ ,  $P=0.012$ ; Fig. 1d). However, there was  
239 no correlation between large kōkopu biomass and average pool depth ( $R^2_c <0.01$ ,  $F_{1,53}=0.02$ ,  
240  $P=0.883$ ; Fig. 1b) or forest cover ( $R^2_c <0.1$ ,  $F_{1,53}=0.45$ ,  $P=0.505$ ; Fig. 1e). Despite having  
241 fewer explanatory variables, model 1L explained just 4% less variation than model 2L ( $R^2_c =$   
242 0.51 and 0.55, respectively; Table 1). Model 1L also better accounted for variation in large  
243 kōkopu biomass, as indicated by the Akaike weights of 0.21 and 0.16, respectively. This  
244 suggested that model 1L was the most suitable for predicting large kōkopu biomass. Table 2  
245 details the summary statistics for model 1L.

246 In contrast to large kōkopu biomass, small kōkopu biomass was negatively correlated  
247 with bank cover ( $R^2_c=0.33$ ,  $F_{1,54}=27.05$ ,  $P<0.001$ ; Fig. 1h) and substrate size ( $R^2_c=0.11$ ,  
248  $F_{1,54}=6.33$ ,  $P=0.012$ ; Fig. 1d), but positively correlated with forest cover ( $R^2_c=0.25$ ,  
249  $F_{1,54}=18.64$ ,  $P<0.001$ ; Fig. 1j). Additionally, small kōkopu biomass was not correlated with  
250 pool area ( $R^2_c=0.03$ ,  $F_{1,54}=1.78$ ,  $P=0.188$ ; Fig. 1f) or pool depth ( $R^2_c=0.01$ ,  $F_{1,54}=0.78$ ,  
251  $P=0.382$ ; Fig. 1g). Four models explained small kōkopu biomass parsimoniously (Table 1).  
252 The first model (1S), which included forest cover and bank cover, explained 3% less  
253 variation than the most explanatory model (3S), which also included pool area ( $R^2_c=0.58$  and  
254 0.61, respectively). However, model 1S was 9% more likely to explain variation in small  
255 kōkopu biomass most parsimoniously than the second model (2S), which also included  
256 average substrate size (Akaike weights = 0.20 and 0.11, respectively). This suggested that  
257 model 1S was the most suitable for predicting small kōkopu biomass. Table 2 details the  
258 summary statistics for model 1S.

259 **Table 1. Top linear mixed-effects models ( $\Delta AIC_c < 2$ ) that explain variation in the total**  
 260 **biomass of large and small kōkopu based on Akaike’s information criterion (AIC).**

| Response                             | Model     | Fixed effects  | $AIC_c$      | $\Delta AIC_c$ | $w$         | $R^2_c$     |
|--------------------------------------|-----------|----------------|--------------|----------------|-------------|-------------|
| Large kōkopu                         |           |                |              |                |             |             |
| $\sqrt{\text{Large kōkopu biomass}}$ | <b>1L</b> | <b>BC + PA</b> | <b>346.7</b> | <b>0.00</b>    | <b>0.20</b> | <b>0.51</b> |
|                                      | 2L        | BC + PA + SS   | 347.1        | 0.46           | 0.16        | 0.55        |
| Small kōkopu                         |           |                |              |                |             |             |
| $\sqrt{\text{Small kōkopu biomass}}$ | <b>1S</b> | <b>FC + BC</b> | <b>203.4</b> | <b>0.00</b>    | <b>0.20</b> | <b>0.58</b> |
|                                      | 2S        | FC + BC + SS   | 204.6        | 1.20           | 0.11        | 0.58        |
|                                      | 3S        | FC + BC + PA   | 205.1        | 1.78           | 0.08        | 0.61        |
|                                      | 4S        | FC             | 205.3        | 1.96           | 0.07        | 0.5         |

261  $AIC_c$  represents AIC values corrected for small sample size, delta  $AIC_c$  ( $\Delta AIC_c$ ) is the  
 262 difference in  $AIC_c$  score between the highest ranked model and the candidate model, the  
 263 Akaike weight ( $w$ ) is the probability that a particular model is the most parsimonious model  
 264 among the candidate models, and  $R^2_c$  is the conditional coefficient of determination. ‘BC’ is  
 265 total bank cover (m), ‘PA’ is total pool area (m<sup>2</sup>), ‘SS’ is average substrate size (cm), and  
 266 ‘FC’ is mean forest cover (%). Models are listed from lowest to highest  $AIC_c$  score within  
 267 each size-class. Bolded models were selected as the most suitable for predicting biomass  
 268 within each size-class.

269 **Table 2. Summary results of the fixed effects included in the linear mixed-effects models**  
 270 **that most parsimoniously predict the total biomass of large and small kōkopu as**  
 271 **identified in Table 1.**

| Model                                                           | Fixed effects | Coefficient estimate ( $\pm$ SE) | P value |
|-----------------------------------------------------------------|---------------|----------------------------------|---------|
| Large kōkopu                                                    |               |                                  |         |
| $\sqrt{\text{Large kōkopu biomass}} \sim \text{BC} + \text{PA}$ | Intercept     | 5.016 ( $\pm$ 1.986)             | 0.016   |
|                                                                 | BC            | 0.108 ( $\pm$ 0.049)             | 0.036   |
|                                                                 | PA            | 0.031 ( $\pm$ 0.015)             | 0.04    |
| Small kōkopu                                                    |               |                                  |         |
| $\sqrt{\text{Small kōkopu biomass}} \sim \text{FC} + \text{BC}$ | Intercept     | 3.033 ( $\pm$ 0.756)             | <0.001  |
|                                                                 | FC            | 0.020 ( $\pm$ 0.009)             | 0.041   |
|                                                                 | BC            | -0.026 ( $\pm$ 0.012)            | 0.035   |

272 ‘BC’ is total bank cover (m), ‘PA’ is total pool area (m<sup>2</sup>), and ‘FC’ is mean forest cover (%).

273

274 **Fig 1. Relationships between habitat features and kōkopu biomass.** Partial regression  
 275 plots showing the independent effect of total pool area (a, f), mean pool depth (b, g), total  
 276 bank cover (c, h), mean substrate size (d, i), and mean forest cover (e, j) on large (row 1), and  
 277 small kōkopu biomass (row 2). Note that the Y-axis is not linear. Dots represent the total  
 278 biomass of giant, banded, and shortjaw kōkopu in the size-class within each 50 m reach.  
 279 Lines of best fit are shown where a significant correlation was found ( $P < 0.05$ ) and error  
 280 bands show 95% confidence intervals determined from model fits.

281

## 282 Discussion

283 The quantification of body size with respect to specific habitat use is crucial for  
 284 accurately identifying key habitats that support all life stages of a species and directing  
 285 beneficial management and restoration efforts [68]. We aimed to identify key habitat features  
 286 that influence the biomass of small and large kōkopu, and to create statistical models that can  
 287 predict kōkopu biomass based on local habitat features while controlling for other influences.  
 288 Our results indicate that small and large kōkopu have distinct habitat requirements, and the  
 289 influence of habitat composition on biomass was not consistent between size-classes. By

290 characterising the effects of local habitat composition on the biomass of small and large  
291 kōkopu separately, we provide a more comprehensive and accurate description of kōkopu  
292 habitat requirements.

293 Total pool area was a key habitat feature for explaining variation in large kōkopu  
294 biomass, whereas average pool depth had little influence. This indicates that large kōkopu  
295 can use most pool habitats, regardless of depth. Pool habitats are commonly associated with  
296 greater biomasses of large stream-dwelling fish like salmonids [69, 70]. Positive correlations  
297 between pool area and large fish biomass is expected, because although faster water  
298 velocities transport more drifting invertebrates downstream, slower flowing habitats such as  
299 pools promote greater feeding success by increasing strike efficiency and prey capture [23].  
300 However, species like kōkopu and trout will maximise their net energy gain by occupying  
301 slow-flowing pools below fast-flowing reaches [2, 15, 71]. Unlike trout, which are  
302 predominantly diurnal visual predators, nocturnal galaxiids rely mainly on mechanical lateral  
303 line and olfactory sensory systems that work most effectively in slow-velocities [72, 73].  
304 Therefore, similarly to other large stream fish, slow-flowing pools likely support greater large  
305 kōkopu biomass because they are profitable foraging areas.

306 Despite pool area being a key habitat requirement for large kōkopu, neither total pool  
307 area nor average pool depth influenced small kōkopu biomass. The lack of relationship  
308 between small kōkopu and pool habitat was likely caused by the greater biomass of large  
309 congeners, which were not restricted by pool depth, competitively displacing smaller  
310 individuals [45, 74]. Small kōkopu may also avoid pools because large individuals  
311 cannibalise smaller congeners [44, 75]. Similar relationships have been observed in drift-  
312 feeding cutthroat trout (*Oncorhynchus clarkii*); large fish occupy deep pools and smaller  
313 young-of-the-year inhabit shallower water [76]. However, in the absence of large  
314 conspecifics, small trout choose, and grow faster in, large pools over shallower water [26].

315 Although small kōkopu are likely displaced into less profitable foraging areas, they still select  
316 habitats with the lowest available velocity [43]. This suggests that slow-flowing pools may be  
317 included in the fundamental niche of small kōkopu, but biotic interactions with larger  
318 predators result in these areas falling outside of their realised niche.

319 In addition to pool habitat, in-stream refuges and large substratum were important  
320 habitat features that were positively associated with large kōkopu biomass. However, unlike  
321 their larger congeners, these features were negatively associated with small kōkopu biomass.  
322 Despite hypothesising that small kōkopu would also use these features for refuges, our results  
323 show that large kōkopu dominate these areas, suggesting they competitively displace smaller  
324 individuals from them. Similarly to kōkopu, in-stream cover is thought to be the most  
325 important habitat feature influencing juvenile and adult salmonid habitat selection [77].  
326 However, most experimental studies that have added wood to streams have found that  
327 juvenile and adult salmonids respond positively [78]. It is important to consider that habitat  
328 structure can also increase predation risk by providing predator habitat [79]. In addition to  
329 large kōkopu, longfin eels (*Anguilla dieffenbachii*) also benefit from greater bank cover  
330 availability, which could also lead to small kōkopu avoiding these microhabitats [17].  
331 Although there are contrasting accounts of preferred in-stream cover, adult banded kōkopu  
332 and giant kōkopu will readily use alternative bank cover when preferred cover is scarce [37].  
333 This suggests that compiling various forms of bank cover into one variable is acceptable for  
334 kōkopu habitat-biomass modelling. In-stream cover is likely the most influential habitat  
335 feature on kōkopu biomass due to the strong conflicting effects on small and large kōkopu  
336 biomass.

337 Unlike pool area and in-stream cover, forest cover was not associated with large  
338 kōkopu biomass. This was unexpected because forested streams generally provide important  
339 terrestrially-derived food subsidies that can support greater fish biomass and contribute up to

340 half the annual energy budget of some drift-feeding species [80, 81]. However, we sampled  
341 in autumn when terrestrial subsidies substantially reduce seasonally [81]. Terrestrial  
342 invertebrates are an essential food resource for banded kōkopu, making up 75% of their diet  
343 by number, and 89% by weight [58]. Importantly, our method of surveying forest canopy  
344 cover within reaches using a densitometer may not accurately represent the availability of  
345 terrestrial food resources because it measures the canopy immediately over the reach,  
346 whereas resources can be sourced from further upstream or from lower-growing riparian  
347 vegetation. Overall, forest cover is not locally important in explaining large kōkopu biomass.

348 In contrast to large kōkopu, forest cover was the only habitat feature that was  
349 positively associated with small kōkopu biomass. This was somewhat expected because  
350 banded kōkopu post-larvae migrate in greater abundances into streams that drain catchments  
351 with greater indigenous forest cover [36]. McDowall [82] hypothesised that kōkopu post-  
352 larvae may use warmer water temperatures to identify more-forested catchments in contrast  
353 to cooler streams that are derived from glaciers and mountainous regions. It is unclear to what  
354 extent small kōkopu benefit from terrestrially-derived food subsidies because their small gape  
355 size may inhibit the capture of larger terrestrial invertebrates [83]. Additionally, because  
356 small kōkopu are displaced competitively from key feeding areas such as pools, smaller fish  
357 would have less access to terrestrial invertebrates. However, forested streams can support  
358 much greater densities of mayflies, stoneflies, and caddisflies that are more suitable prey for  
359 fish with a smaller gape size [84]. The size-specific importance of stream shading could be  
360 attributed to smaller kōkopu being more at risk of predation from visually feeding avian  
361 predators such as kingfishers (*Todiramphus sanctus*) due to being displaced from daytime  
362 refuges. In less shaded shallow streams, small cutthroat trout were more susceptible to visual  
363 avian predators than large trout because of predator gape-limitations [85]. Furthermore, shade  
364 was particularly important when in-stream cover was limited [85]. This indicates that small



365 kōkopu may occupy reaches with greater forest canopy cover to reduce the likelihood of  
366 predation rather than for terrestrial inputs.

367         The absence of mutually benefitting habitat features on small and large kōkopu  
368 biomass indicates that there is no key feature that can be used to benefit all of the life stages  
369 of kōkopu, and that habitat restoration efforts will need to consider small and large kōkopu  
370 habitats concurrently. Because of these conflicts, it is important to identify which habitat  
371 compositions provide the greatest benefits to the population of reproductively valuable adults  
372 over time [86]. If juvenile habitats are limited or degraded, adult populations may become  
373 limited by recruits [87]. However, if an adult population typically has excess recruits and is  
374 limited by habitat then the most beneficial management decisions could be to prioritise adult  
375 habitats. Often, a balance of adult and juvenile habitat requirements must be incorporated into  
376 management restoration to benefit the overall population. For example, gravel augmentation  
377 is a key tool used for restoring salmonid spawning and incubation grounds [88]. However, a  
378 conflict arose when adult Chinook salmon (*Oncorhynchus tshawytscha*) preferentially  
379 spawned in fine gravels where embryo survival was least likely [88]. Therefore, it was  
380 suggested that intermediate sized gravels would maximize overall reproductive success  
381 across both spawning and incubation life stages. Comparatively, despite being associated  
382 with a decrease in small kōkopu biomass, there would likely be greater conservation benefits  
383 in adding in-stream refuges into reaches with habitat-limited adult kōkopu populations and  
384 excess juveniles, due to adults being reproductively valuable. Further research is required to  
385 investigate which balance of juvenile and adult habitats provides the greatest benefits to  
386 kōkopu populations.

387         In conclusion, this study demonstrates the importance of examining size-related  
388 habitat use when identifying key habitats that support species, and provides a detailed and  
389 effective modelling approach for predicting small and large size-classes of stream fish using

390 simple habitat measurements. We showed that large kōkopu biomass was best explained by a  
391 combination of total pool area and bank cover availability, whereas small kōkopu biomass  
392 was best explained by a combination of total bank cover and average forest cover. With this  
393 enhanced understanding of how kōkopu size-classes are influenced by their local  
394 environments, we can obtain a standardised prediction of likely kōkopu biomass based on  
395 local habitat characteristics. These standardised predictions can be used to isolate and  
396 accurately test how anthropogenic stressors affect populations of these declining endemic  
397 kōkopu species [86]. Modelling techniques such as those presented in this study will likely be  
398 a crucial tool used in conserving freshwater fish species by effectively evaluating population  
399 distributions and densities, streamlining habitat restoration efforts, and mitigating  
400 anthropogenic stressors [89].

401

#### 402 **Acknowledgements**

403 We thank the Marine Ecology Research Group for field assistance, and the New Zealand  
404 Ministry of Business, Innovation and Employment, Department of Conservation and  
405 University of Canterbury for support. All sampling was approved by the University of  
406 Canterbury Animal Ethics Committee (2020/06R).

#### 407 **References**

- 408 1. Abell R. Conservation biology for the biodiversity crisis: a freshwater follow-up.  
409 *Conservation Biology*. 2002;16(5):1435-1437.
- 410 2. Banish NP, Peterson JT, Thurow RF. Physical, biotic, and sampling influences on diel  
411 habitat use by stream-dwelling bull trout. *North American Journal of Fisheries Management*.  
412 2008;28(1):176-187.
- 413 3. Smialek N, Pander J, Mueller M, van Treeck R, Wolter C, Geist J. Do we know enough  
414 to save European riverine fish?—a systematic review on autecological requirements during  
415 critical life stages of 10 rheophilic species at risk. *Sustainability*. 2019;11(18).
- 416 4. Dudgeon D, Arthington AH, Gessner MO, Kawabata Z-I, Knowler DJ, Lévêque C, et al.  
417 Freshwater biodiversity: importance, threats, status and conservation challenges. *Biological*  
418 *reviews of the Cambridge Philosophical Society*. 2006;81(2):163-182.

- 419 5. Arthington AH, Dulvy NK, Gladstone W, Winfield IJ. Fish conservation in freshwater  
420 and marine realms: status, threats and management. *Aquatic Conservation: marine and*  
421 *Freshwater Ecosystems*. 2016;26(5):838-857.
- 422 6. Logez M, Bady P, Pont D. Modelling the habitat requirement of riverine fish species  
423 at the European scale: sensitivity to temperature and precipitation and associated  
424 uncertainty. *Ecology of Freshwater Fish*. 2012;21(2):266-282.
- 425 7. Van Looy K, Tonkin JD, Floury M, Leigh C, Soininen J, Larsen S, et al. The three Rs of  
426 river ecosystem resilience: resources, recruitment, and refugia. *River Research and*  
427 *Applications*. 2019;35(2):107-120.
- 428 8. Oele DL, Gaeta JW, Rypel AL, McIntyre PB. Growth and recruitment dynamics of  
429 young-of-year northern pike: implications for habitat conservation and management.  
430 *Ecology of Freshwater Fish*. 2018;28(2):285-301.
- 431 9. Inoue M, Nakano S, Nakamura F. Juvenile masu salmon (*Oncorhynchus masou*)  
432 abundance and stream habitat relationships in northern Japan. *Canadian Journal of*  
433 *Fisheries and Aquatic Sciences*. 1997;54:1331-1341.
- 434 10. Bonnett ML, Sykes JRE. Habitat preferences of giant kokopu, *Galaxias argenteus*.  
435 *New Zealand Journal of Marine and Freshwater Research*. 2002;36(1):13-24.
- 436 11. Akbaripasand A, Closs GP. Effects of food supply and stream physical characteristics  
437 on habitat use of a stream-dwelling fish. *Ecology of Freshwater Fish*. 2018;27(1):270-279.
- 438 12. Facey DE, Grossman GD. The relationship between water velocity, energetic costs,  
439 and microhabitat use in four North American stream fishes. *Hydrobiologia*. 1992;239(1):1-6.
- 440 13. Pert EJ, Erman DC. Habitat use by adult rainbow trout under moderate artificial  
441 fluctuations in flow. *Transactions of the American Fisheries Society*. 1994;123(6):913-923.
- 442 14. Rosenfeld JS, Boss S. Fitness consequences of habitat use for juvenile cutthroat  
443 trout: energetic costs and benefits in pools and riffles. *Canadian Journal of Fisheries and*  
444 *Aquatic Sciences*. 2001;58(3):585-593.
- 445 15. Naman SM, Rosenfeld JS, Kiffney PM, Richardson JS. The energetic consequences of  
446 habitat structure for forest stream salmonids. *Journal of Animal Ecology*. 2018;87(5):1383-  
447 1394.
- 448 16. Skyfield JP, Grossman GD. Microhabitat use, movements and abundance of gilt  
449 darters (*Percina evides*) in southern Appalachian (USA) streams. *Ecology of Freshwater Fish*.  
450 2008;17(2):219-230.
- 451 17. Baillie BR, Hicks BJ, van den Heuvel MR, Kimberley MO, Hogg ID. The effects of wood  
452 on stream habitat and native fish assemblages in New Zealand. *Ecology of Freshwater Fish*.  
453 2013;22(4):553-566.
- 454 18. Dolloff CA, Warren MLJ. Fish relationships with large wood in small streams.  
455 *American Fisheries Society Symposium*. 2003;37:179-193.
- 456 19. Zalewski M, Lapimska M, Bayley PB. Fish relationships with wood in large rivers.  
457 *American Fisheries Society Symposium*. 2003:1-17.
- 458 20. Heggenes J. Habitat selection by brown trout (*Salmo trutta*) and young Atlantic  
459 salmon (*S. salar*) in streams: static and dynamic hydraulic modelling. *Regulated rivers*.  
460 1996;12(2-3):155-169.
- 461 21. Hill J, Grossman GD. An energetic model of microhabitat use for rainbow trout and  
462 rosyside dace. *Ecology*. 1993;74(3):685-698.
- 463 22. Petty JT, Grossman GD. Patch selection by mottled sculpin (Pisces: Cottidae) in a  
464 southern Appalachian stream. *Freshwater Biology*. 1996;35:261-276.

- 465 23. Grossman GD, Rincon PA, Farr MD, Ratajczak REJ. A new optimal foraging model  
466 predicts habitat use by drift-feeding stream minnows. *Ecology of Freshwater Fish*.  
467 2002;11:2-10.
- 468 24. Lapointe NWR, Corkum LD, Mandrak NE. Seasonal and ontogenic shifts in  
469 microhabitat selection by fishes in the shallow waters of the detroit river, a large connecting  
470 channel. *Transactions of the American Fisheries Society*. 2011;136(1):155-166.
- 471 25. Hansen EA, Closs GP. Long-term growth and movement in relation to food supply  
472 and social status in a stream fish. *Behavioral Ecology*. 2009;20(3):616-623.
- 473 26. Rosenfeld J. Assessing the habitat requirements of stream fishes: an overview and  
474 evaluation of different approaches. *Transactions of the American Fisheries Society*.  
475 2003;132:953-968.
- 476 27. Akbaripasand A, Ramezani J, Lokman PM, Closs GP. Does social status within a  
477 dominance hierarchy mediate individual growth, residency and relocation? *Oecologia*.  
478 2014;176(3):771-779.
- 479 28. Swales S, West DW. Distribution, abundance and conservation status of native fish in  
480 some Waikato streams in the North Island of New Zealand. *Journal of the Royal Society of  
481 New Zealand*. 1991;21(4):281-296.
- 482 29. Bonnett ML, McDowall RM, Sykes JRE. Critical habitats for the conservation of giant  
483 kokopu, *Galaxias argenteus* (Gmelin, 1789). *Science for Conservation*. 2002;206:50.
- 484 30. Jowett IG, Hayes JW, Deans N, Eldon GA. Comparison of fish communities and  
485 abundance in unmodified streams of Kahurangi National Park with other areas of New  
486 Zealand. *New Zealand Journal of Marine and Freshwater Research*. 1998;32(2):307-322.
- 487 31. Rowe D, Hicks M, Richardson J. Reduced abundance of banded kokopu (*Galaxias  
488 fasciatus*) and other native fish in turbid rivers of the North Island of New Zealand. *New  
489 Zealand Journal of Marine and Freshwater Research*. 2000;34(3):547-558.
- 490 32. Eikaas HSM, A. Habitat loss through disruption of constrained dispersal networks.  
491 *Ecological Applications*. 2006;16(3):987-998.
- 492 33. David BO, Hamer MP. Remediation of a perched stream culvert with ropes improves  
493 fish passage. *Marine and Freshwater Research*. 2012;63(5): 440-449.
- 494 34. David BO, Closs GP, Arbuckle CJ. Distribution of fish in tributaries of the lower  
495 Taieri/Waipori rivers, South Island, New Zealand. *New Zealand Journal of Marine and  
496 Freshwater Research*. 2002;36(4):797-808.
- 497 35. Goodman J. The ecology and conservation of shortjaw kokopu (*Galaxias postvectis*)  
498 in Nelson and Marlborough. MSc. thesis, University of Canterbury, Christchurch, New  
499 Zealand; 2002.
- 500 36. Yungnickel MR, Hickford MJH, Schiel DR. Spatio-temporal variation in species  
501 composition of New Zealand's whitebait fishery. *New Zealand Journal of Marine and  
502 Freshwater Research*. 2020;54(4):679-694.
- 503 37. Baker CF, Smith JP. Habitat use by banded kokopu (*Galaxias fasciatus*) and giant  
504 kokopu (*G. argenteus*) co-occurring in streams draining the Hakarimata Range, New  
505 Zealand. *New Zealand Journal of Marine and Freshwater Research*. 2007;41(1):25-33.
- 506 38. McDowall RM, Main MR, West DW, Lyon GL. Terrestrial and benthic foods in the diet  
507 of the shortjawed kokopu, *Galaxias postvectis* Clarke (Teleostei: Galaxiidae). *New Zealand  
508 Journal of Marine and Freshwater Research*. 1996;30(2):257-269.
- 509 39. McDowall RM. Indigenous vegetation type and the distribution of shortjawed  
510 kokopu, *Galaxias postvectis* (Teleostei: Galaxiidae), in New Zealand. *New Zealand Journal of  
511 Zoology*. 1997;24(3):243-255.

- 512 40. Rowe DK, Smith J. Use of in-stream cover types by adult banded kokopu (*Galaxias*  
513 *fasciatus*) in first-order North Island, New Zealand, streams. *New Zealand Journal of Marine*  
514 *and Freshwater Research*. 2003;37(3):541-552.
- 515 41. Chadderton WL, Allibone RM. Habitat use and longitudinal distribution patterns of  
516 native fish from a near pristine Stewart Island, New Zealand, stream. *New Zealand Journal*  
517 *of Marine and Freshwater Research*. 2000;34(3):487-499.
- 518 42. Hansen EA, Closs GP. Diel activity and home range size in relation to food supply in a  
519 drift-feeding stream fish. *Behavioral Ecology*. 2005;16(3):640-648.
- 520 43. Akbaripasand A, Nichol EC, Lokman PM, Closs GP. Microhabitat use of a native New  
521 Zealand galaxiid fish, *Galaxias fasciatus*. *New Zealand Journal of Marine and Freshwater*  
522 *Research*. 2011;45(1):135-144.
- 523 44. Whitehead A. Ontogenetic shift in nocturnal microhabitat selection by giant kokopu  
524 in a New Zealand stream. *Journal of Fish Biology*. 2002;61(6):1373-1385.
- 525 45. David BO, Closs GP, Crow SK, Hansen EA. Is diel activity determined by social rank in  
526 a drift-feeding stream fish dominance hierarchy? *Animal Behaviour*. 2007;74(2):259-263.
- 527 46. Jowett IG, Richardson J. Fish communities in New Zealand rivers and their  
528 relationship to environmental variables. *New Zealand Journal of Marine and Freshwater*  
529 *Research*. 2003;37(2):347-366.
- 530 47. Hopkins CL. Age-related growth characteristics of *Galaxias fasciatus* (Salmoniformes:  
531 Galaxiidae). *New Zealand Journal of Marine and Freshwater Research*. 1979;13(1):39-46.
- 532 48. McCullough CD. Abundance, behaviour, and habitat requirements of the banded  
533 kokopu *Galaxias fasciatus* Gray (Pisces: Galaxiidae). MSc. thesis, University of Waikato;  
534 1998.
- 535 49. Jellyman DJ. Observations on the biology of the giant kokopu, *Galaxias argenteus*  
536 (Gmelin 1789). *Mauri Ora*. 1979;7:53-61.
- 537 50. Burnham KP, Anderson DR. Model selection and multimodel inference: a practical  
538 information-theoretic approach. 2nd ed. New York: Springer; 2002.
- 539 51. Leathwick JR, West D, Chadderton L, Gerbeaux P, Kelly D, Robertson H, et al.  
540 *Freshwater Ecosystems of New Zealand (FENZ) geodatabase user guide*. 2010.
- 541 52. National Institute of Water and Atmospheric Research. *New Zealand Freshwater Fish*  
542 *Database 2021*. Available from: <https://nzffdms.niwa.co.nz/>.
- 543 53. Lemmon PE. A new instrument for measuring forest overstory density. *Journal of*  
544 *Forestry*. 1957;55(9):667-668.
- 545 54. Mosley MP. A procedure for characterising river channels. Ministry of Works and  
546 Development Water and Soil Miscellaneous Publication 32. 1982:68 p.
- 547 55. Joy M, David B, Lake MD. *New Zealand freshwater fish sampling protocols: part 1,*  
548 *wadeable rivers & streams*. The Ecology Group, Massey University. 2013.
- 549 56. David BO, Closs GP. Seasonal variation in diel activity and microhabitat use of an  
550 endemic New Zealand stream-dwelling galaxiid fish. *Freshwater Biology*. 2003;48:1765-  
551 1781.
- 552 57. Hickey MA, Closs GP. Evaluating the potential of night spotlighting as a method for  
553 assessing species composition and brown trout abundance: a comparison with  
554 electrofishing in small streams. *Journal of Fish Biology*. 2006;69(5):1513-1523.
- 555 58. West DW, Jowett IG, Richardson J. Growth, diet, movement, and abundance of adult  
556 banded kokopu (*Galaxias fasciatus*) in five Coromandel, New Zealand streams. *New Zealand*  
557 *Journal of Marine and Freshwater Research*. 2005;39(4):915-929.

- 558 59. Joy MK, Death RG. Control of freshwater fish and crayfish community structure in  
559 Taranaki, New Zealand: dams, diadromy or habitat structure? *Freshwater Biology*.  
560 2001;46(3):417-429.
- 561 60. Swain NR, Reynolds JD. Effects of salmon-derived nutrients and habitat  
562 characteristics on population densities of stream-resident sculpins. *PLoS One*.  
563 2015;10(6):e0116090.
- 564 61. Gałdecki A, Burzykowski T. Fitting linear mixed-effects models: the lme()function. New  
565 York, NY: Springer New York; 2012. 275-301.
- 566 62. R Development Core Team. R: a language and environment for statistical computing.  
567 R Foundation for Statistical Computing, Vienna, Austria; 2021. Available from:  
568 <https://www.R-project.org/>.
- 569 63. Fabozzi FJ, Focardi SM, Rachev ST, Arshanapalli BG. The basics of financial  
570 econometrics: tools, concepts, and asset management applications: John Wiley & Sons, Inc;  
571 2014.
- 572 64. Symonds MRE, Moussalli A. A brief guide to model selection, multimodel inference  
573 and model averaging in behavioural ecology using Akaike's information criterion. *Behavioral*  
574 *Ecology and Sociobiology*. 2011;65(1):13-21.
- 575 65. Nakagawa S, Schielzeth H, O'Hara RB. A general and simple method for obtaining  $R^2$   
576 from generalized linear mixed-effects models. *Methods in Ecology and Evolution*.  
577 2013;4(2):133-142.
- 578 66. Elith J, Leathwick JR, Hastie T. A working guide to boosted regression trees. *Journal*  
579 *of Animal Ecology*. 2008;77(4):802-813.
- 580 67. Fox J. Effect displays in R for generalised linear models. *Journal of Statistical*  
581 *Software*. 2003;8(15):1-9.
- 582 68. Cooke SJ, Martins EG, Struthers DP, Gutowsky LF, Power M, Doka SE, et al. A moving  
583 target—incorporating knowledge of the spatial ecology of fish into the assessment and  
584 management of freshwater fish populations. *Environmental Monitoring and Assessment*.  
585 2016;188(4):239.
- 586 69. Warren DR, Mineau MM, Ward EJ, Kraft CE. Relating fish biomass to habitat and  
587 chemistry in headwater streams of the northeastern United States. *Environmental Biology*  
588 *of Fishes*. 2010;88(1):51-62.
- 589 70. Heggenes J, Northcote TG, Peter A. Spatial stability of cutthroat trout (*Oncorhynchus*  
590 *clarki*) in a small, coastal stream. *Canadian Journal of Fisheries and Aquatic Sciences*.  
591 1991;48(5):757-762.
- 592 71. Spina AP. Habitat partitioning in a patchy environment: considering the role of  
593 intraspecific competition. *Environmental Biology of Fishes*. 2000;57:393-400.
- 594 72. McIntosh AR, Townsend CR. Interpopulation variation in mayfly antipredator tactics:  
595 differential effects of contrasting predatory fish. *Ecology*. 1994;75(7):2078-2090.
- 596 73. Baker CF. Lateral line and olfactory sensory systems in the biology of the banded  
597 kokopu *Galaxias Fasciatus*. PhD thesis, University of Auckland, Auckland, New Zealand;  
598 2000.
- 599 74. David BO, Stoffels RJ. Spatial organisation and behavioural interaction of giant  
600 kokopu (*Galaxias argenteus*) in two stream pools differing in fish density. *New Zealand*  
601 *Journal of Marine and Freshwater Research*. 2003;37(2):315-322.
- 602 75. Bonnett ML, Lambert PW. Diet of giant kokopu, *Galaxias argenteus*. *New Zealand*  
603 *Journal of Marine and Freshwater Research*. 2002;36(2):361-369.

- 604 76. Rosenfeld J, Porter M, Parkinson E. Habitat factors affecting the abundance and  
605 distribution of juvenile cutthroat trout (*Oncorhynchus clarki*) and coho salmon  
606 (*Oncorhynchus kisutch*). Canadian Journal of Fisheries and Aquatic Sciences. 2000;57(4):766-  
607 774.
- 608 77. Armstrong JD, Kemp PS, Kennedy GJA, Ladle M, Milner NJ. Habitat requirements of  
609 Atlantic salmon and brown trout in rivers and streams. Fisheries Research. 2003;62(2):143-  
610 170.
- 611 78. Roni P, Beechie T, Pess G, Hanson K, Jonsson B. Wood placement in river restoration:  
612 fact, fiction, and future direction. Canadian Journal of Fisheries and Aquatic Sciences.  
613 2015;72(3):466-478.
- 614 79. Henderson MJ, Iglesias IS, Michel CJ, Ammann AJ, Huff DD. Estimating spatial-  
615 temporal differences in Chinook salmon outmigration survival with habitat- and predation-  
616 related covariates. Canadian Journal of Fisheries and Aquatic Sciences. 2019;76(9):1549-  
617 1561.
- 618 80. Kawaguchi YN, S. Contribution of terrestrial invertebrates to the annual resource  
619 budget for salmonids in forest and grassland reaches of a headwater stream. Freshwater  
620 Biology. 2001;46:303-316.
- 621 81. Baxter CV, Fausch KD, Carl Saunders W. Tangled webs: reciprocal flows of  
622 invertebrate prey link streams and riparian zones. Freshwater Biology. 2005;50(2):201-220.
- 623 82. McDowall RM. The composition of the New Zealand whitebait catch, 1964. New  
624 Zealand Journal of Science. 1965;8(3):285-300.
- 625 83. Schmitt RJ, Holbrook SJ. Gape-limitation, foraging tactics and prey size selectivity of  
626 two microcarnivorous species of fish. Oecologia. 1984;63(1):6-12.
- 627 84. Quinn JM, Cooper AB, Davies-Colley RJ, Rutherford JC, Williamson RB. Land use  
628 effects on habitat, water quality, periphyton, and benthic invertebrates in Waikato, New  
629 Zealand, hill-country streams. New Zealand Journal of Marine and Freshwater Research.  
630 1997;31(5):579-597.
- 631 85. Penaluna BE, Dunham JB, Noakes DLG. Instream cover and shade mediate avian  
632 predation on trout in semi-natural streams. Ecology of Freshwater Fish. 2015;25(3):405-411.
- 633 86. Parsons DM, Middleton C, Smith MD, Cole RG. The influence of habitat availability on  
634 juvenile fish abundance in a northeastern New Zealand estuary. New Zealand Journal of  
635 Marine and Freshwater Research. 2014;48(2):216-228.
- 636 87. Halpern BS, Gaines SD, Warner RR. Habitat size, recruitment, and longevity as factors  
637 limiting population size in stage structured species. The American Naturalist.  
638 2005;165(1):82-94.
- 639 88. Merz J, Caldwell L, Beakes M, Hammersmark C, Sellheim K. Balancing competing  
640 life-stage requirements in salmon habitat rehabilitation: between a rock and a hard place.  
641 Restoration Ecology. 2018;27(3):661-671.
- 642 89. Leathwick J, Julian K, Elith J, Rowe D. Predicting the distributions of freshwater fish  
643 species for all New Zealand's rivers and streams. 2008.

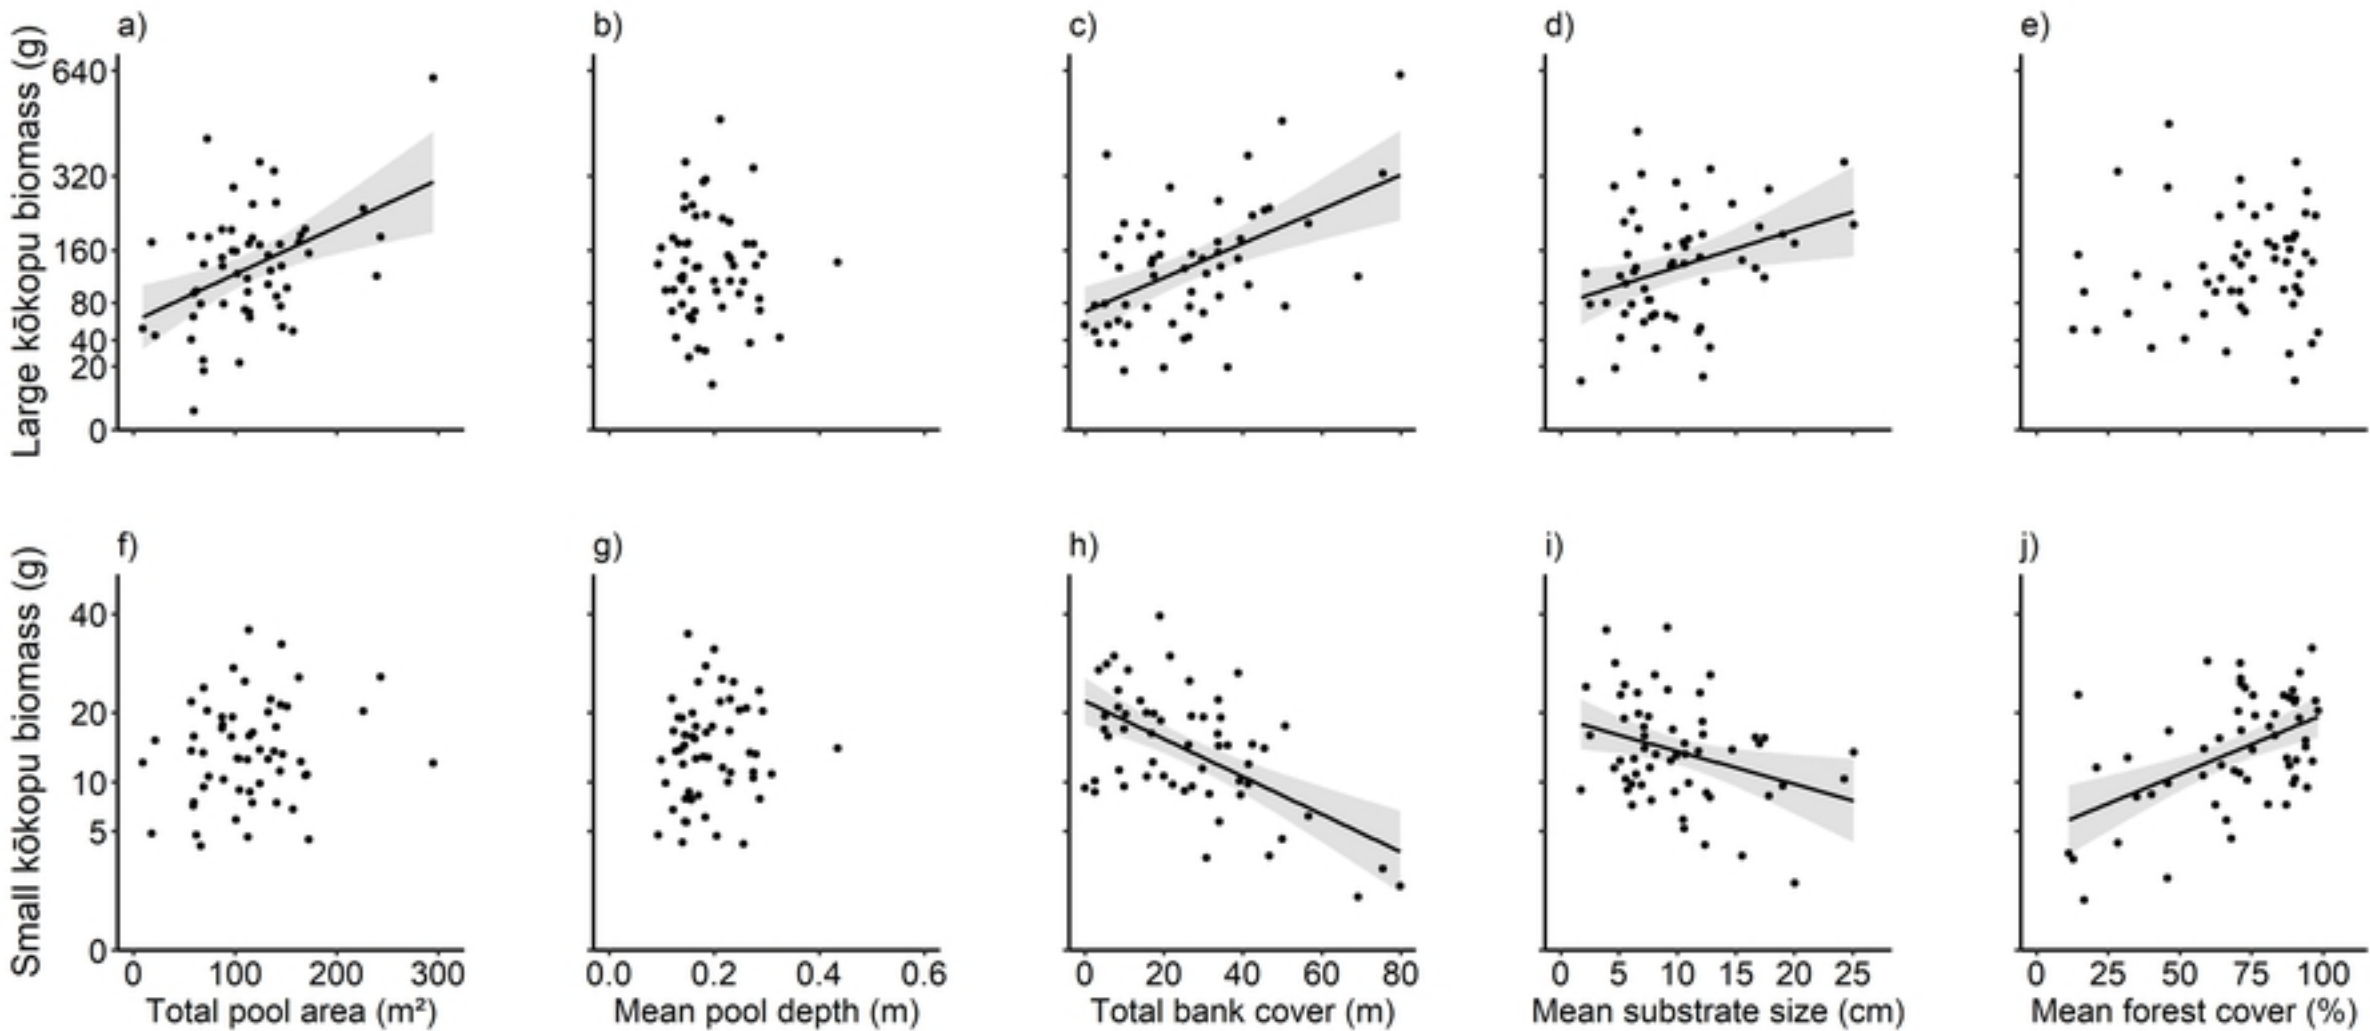

Fig1
